# Supplementary material for: Hydrated halogenides of Eu(ii): structure, spectroscopy and charge density analysis
Source: Royal Society of Chemistry journal article supplement (doi:10.1039/d4nj02731k), 2024-01-01
Supplement: d4nj02731k1.pdf [file d4nj02731k1.pdf]

Supplementary material

Table S1. Data collection and refinement details for **Cl2**

|                                                                            |                                                 |
|----------------------------------------------------------------------------|-------------------------------------------------|
| Chemical formula                                                           | H <sub>4</sub> Cl <sub>2</sub> EuO <sub>2</sub> |
| $M_r$                                                                      | 258.89                                          |
| Crystal system, space group                                                | Monoclinic, <i>C2/c</i>                         |
| Temperature (K)                                                            | 100                                             |
| $a, b, c$ (Å)                                                              | 11.636 (3), 6.358 (2), 6.637 (2)                |
| $\beta$ (°)                                                                | 105.81 (3)                                      |
| $V$ (Å <sup>3</sup> )                                                      | 472.4 (2)                                       |
| $Z$                                                                        | 4                                               |
| Radiation type                                                             | Mo $K\alpha$                                    |
| $\mu$ (mm <sup>-1</sup> )                                                  | 14.24                                           |
| Crystal size (mm)                                                          | 0.21 × 0.12 × 0.06                              |
| Diffractometer                                                             | Xcalibur, Ruby                                  |
| $T_{\min}, T_{\max}$                                                       | 0.194, 0.541                                    |
| No. of measured, independent and observed [ $I > 2\sigma(I)$ ] reflections | 3765, 653, 642                                  |
| $R_{\text{int}}$                                                           | 0.023                                           |
| $(\sin \theta/\lambda)_{\text{max}}$ (Å <sup>-1</sup> )                    | 0.701                                           |
| $R[F^2 > 2\sigma(F^2)], wR(F^2), S$                                        | 0.013, 0.033, 1.23                              |
| No. of reflections                                                         | 653                                             |
| No. of parameters                                                          | 32                                              |
| H-atom treatment                                                           | All H-atom parameters refined                   |
| $\Delta\rho_{\text{max}}, \Delta\rho_{\text{min}}$ (e Å <sup>-3</sup> )    | 0.44, -1.07                                     |

Computer programs: *CrysAlis PRO*, Agilent Technologies, Version 1.171.35.19 (release 27-10-2011 CrysAlis171 .NET) (compiled Oct 27 2011, 15:02:11), *SHELXS97* (Sheldrick, 1990), *SHELXL97* (Sheldrick, 1997).

Table S2. Data collection and refinement details for **Cl6**

|                             |                                                  |
|-----------------------------|--------------------------------------------------|
| Chemical formula            | Cl <sub>2</sub> EuH <sub>12</sub> O <sub>6</sub> |
| $M_r$                       | 330.96                                           |
| Crystal system, space group | Trigonal, <i>P321</i>                            |
| Temperature (K)             | 80                                               |
| $a, c$ (Å)                  | 7.923 (2), 4.089 (1)                             |
| $V$ (Å <sup>3</sup> )       | 222.29 (10)                                      |
| $Z$                         | 1.0                                              |
| Radiation type              | Mo $K\alpha$                                     |
| $\mu$ (mm <sup>-1</sup> )   | 7.63                                             |
| Crystal size (mm)           | 0.18 × 0.07 × 0.05                               |
| Diffractometer              | Xcalibur, Ruby, Gemini ultra                     |
| $T_{\min}, T_{\max}$        | 0.437, 0.752                                     |

|                                                                               |                     |
|-------------------------------------------------------------------------------|---------------------|
| No. of measured, independent and observed [ $F > 6\sigma(F)$ ] reflections    | 27961, 2091, 2091   |
| $R_{\text{int}}$                                                              | 0.039               |
| $(\sin \theta/\lambda)_{\text{max}}$ ( $\text{\AA}^{-1}$ )                    | 1.186               |
| $R[F > 6\sigma(F)]$ , $wR(F^2)$ , $S$                                         | 0.009, 0.0223, 0.75 |
| No. of reflections                                                            | 2091                |
| No. of parameters                                                             | 66                  |
| $\Delta\rho_{\text{max}}$ , $\Delta\rho_{\text{min}}$ ( $\text{e \AA}^{-3}$ ) | 0.72, -2.86         |
| Absolute structure parameter                                                  | -0.003 (8)          |

Computer programs: *CrysAlis PRO* 1.171.42.50a (Rigaku OD, 2022), *SHELXS*, Volkov *et al.*, (2006).

Table S3. Data collection and refinement details for **Br1**

|                                                                               |                                   |
|-------------------------------------------------------------------------------|-----------------------------------|
| Chemical formula                                                              | $\text{Br}_2\text{H}_2\text{EuO}$ |
| $M_r$                                                                         | 329.80                            |
| Crystal system, space group                                                   | Orthorhombic, <i>Pnma</i>         |
| Temperature (K)                                                               | 100                               |
| $a$ , $b$ , $c$ ( $\text{\AA}$ )                                              | 11.349 (1), 4.278 (1), 9.144 (1)  |
| $V$ ( $\text{\AA}^3$ )                                                        | 443.95 (12)                       |
| $Z$                                                                           | 4                                 |
| Radiation type                                                                | Mo $K\alpha$                      |
| $\mu$ ( $\text{mm}^{-1}$ )                                                    | 31.93                             |
| Crystal size (mm)                                                             | $0.13 \times 0.08 \times 0.05$    |
| Diffractometer                                                                | Xcalibur, Ruby, Gemini ultra      |
| $T_{\text{min}}$ , $T_{\text{max}}$                                           | 0.122, 0.344                      |
| No. of measured, independent and observed [ $I > 2\sigma(I)$ ] reflections    | 3250, 667, 632                    |
| $R_{\text{int}}$                                                              | 0.024                             |
| $(\sin \theta/\lambda)_{\text{max}}$ ( $\text{\AA}^{-1}$ )                    | 0.698                             |
| $R[F^2 > 2\sigma(F^2)]$ , $wR(F^2)$ , $S$                                     | 0.012, 0.026, 1.13                |
| No. of reflections                                                            | 667                               |
| No. of parameters                                                             | 32                                |
| $\Delta\rho_{\text{max}}$ , $\Delta\rho_{\text{min}}$ ( $\text{e \AA}^{-3}$ ) | 0.72, -0.57                       |

Computer programs: *CrysAlis PRO* 1.171.41.80a (Rigaku OD, 2020), *SHELXS*, *SHELXL2018/3* (Sheldrick, 2018).

Table S4. Data collection and refinement details for **Br6**

|                             |                                        |
|-----------------------------|----------------------------------------|
| Chemical formula            | $\text{Br}_2\text{H}_{12}\text{EuO}_6$ |
| $M_r$                       | 419.88                                 |
| Crystal system, space group | Trigonal, <i>P321</i>                  |
| Temperature (K)             | 100                                    |

|                                                                                                                               |                               |
|-------------------------------------------------------------------------------------------------------------------------------|-------------------------------|
| $a, c$ (Å)                                                                                                                    | 8.200 (2), 4.138 (1)          |
| $V$ (Å <sup>3</sup> )                                                                                                         | 240.96 (13)                   |
| $Z$                                                                                                                           | 1                             |
| Radiation type                                                                                                                | Mo $K\alpha$                  |
| $\mu$ (mm <sup>-1</sup> )                                                                                                     | 14.78                         |
| Crystal size (mm)                                                                                                             | 0.17 × 0.10 × 0.08            |
| Diffractometer                                                                                                                | Xcalibur, Ruby, Gemini ultra  |
| $T_{\min}, T_{\max}$                                                                                                          | 0.194, 0.434                  |
| No. of measured, independent and observed [ $I > 2\sigma(I)$ ] reflections                                                    | 3999, 454, 453                |
| $R_{\text{int}}$                                                                                                              | 0.040                         |
| $(\sin \theta/\lambda)_{\text{max}}$ (Å <sup>-1</sup> )                                                                       | 0.702                         |
| $R[F^2 > 2\sigma(F^2)], wR(F^2), S$                                                                                           | 0.012, 0.029, 1.13            |
| No. of reflections                                                                                                            | 454                           |
| No. of parameters                                                                                                             | 25                            |
| H-atom treatment                                                                                                              | All H-atom parameters refined |
| $\Delta\rho_{\text{max}}, \Delta\rho_{\text{min}}$ (e Å <sup>-3</sup> )                                                       | 0.46, -0.51                   |
| Absolute structure parameter                                                                                                  | 0.022 (18)                    |
| Computer programs: <i>CrysAlis PRO</i> 1.171.41.80a (Rigaku OD, 2020), <i>SHELXS</i> , <i>SHELXL2018/3</i> (Sheldrick, 2018). |                               |

Table S5. Data collection and refinement details for **I6**

|                                                                            |                                                 |
|----------------------------------------------------------------------------|-------------------------------------------------|
| Chemical formula                                                           | EuH <sub>12</sub> I <sub>2</sub> O <sub>6</sub> |
| $M_r$                                                                      | 513.86                                          |
| Crystal system, space group                                                | Trigonal, $P321$                                |
| Temperature (K)                                                            | 100                                             |
| $a, c$ (Å)                                                                 | 8.565 (2), 4.241 (1)                            |
| $V$ (Å <sup>3</sup> )                                                      | 269.43 (14)                                     |
| $Z$                                                                        | 1                                               |
| Radiation type                                                             | Mo $K\alpha$                                    |
| $\mu$ (mm <sup>-1</sup> )                                                  | 11.53                                           |
| Crystal size (mm)                                                          | 0.17 × 0.11 × 0.05                              |
| Diffractometer                                                             | Xcalibur, Ruby, Gemini ultra                    |
| $T_{\min}, T_{\max}$                                                       | 0.251, 0.603                                    |
| No. of measured, independent and observed [ $I > 2\sigma(I)$ ] reflections | 5433, 514, 510                                  |
| $R_{\text{int}}$                                                           | 0.031                                           |
| $(\sin \theta/\lambda)_{\text{max}}$ (Å <sup>-1</sup> )                    | 0.699                                           |
| $R[F^2 > 2\sigma(F^2)], wR(F^2), S$                                        | 0.021, 0.051, 1.41                              |
| No. of reflections                                                         | 514                                             |

|                                                             |             |
|-------------------------------------------------------------|-------------|
| No. of parameters                                           | 25          |
| $\Delta\rho_{\max}, \Delta\rho_{\min}$ (e Å <sup>-3</sup> ) | 2.84, -3.69 |
| Absolute structure parameter                                | 0.027 (14)  |

Computer programs: *CrysAlis PRO* 1.171.42.50a (Rigaku OD, 2022), *SHELXS*, *SHELXL2018/3* (Sheldrick, 2018).

---Table S6. Hydrogen bonds and interactions.

| H-bond                       | D-H (Å)  | H...A (Å) | D...A (Å)  | $\angle(\text{D-H}\cdots\text{A})$ (°) |
|------------------------------|----------|-----------|------------|----------------------------------------|
| <b>Cl2</b>                   |          |           |            |                                        |
| O-H1...Cl <sup>i</sup>       | 0.87(5)  | 2.22(5)   | 3.080(3)   | 170(4)                                 |
| O-H2...Cl <sup>ii</sup>      | 0.77(4)  | 2.54(4)   | 2.225(3)   | 149(4)                                 |
| <b>Cl6</b>                   |          |           |            |                                        |
| O1W-H1W1...Cl <sup>iii</sup> | 0.99     | 2.21      | 3.1882(11) | 172                                    |
| O2W-H1W2...Cl <sup>iii</sup> | 0.98     | 2.65      | 3.5813(6)  | 159                                    |
| <b>Br1</b>                   |          |           |            |                                        |
| OW-H1...Br2 <sup>iv</sup>    | 0.70(5)  | 2.84(5)   | 3.310(3)   | 128(5)                                 |
| OW-H1...Br1 <sup>v</sup>     | 0.70(5)  | 2.92(4)   | 3.383(3)   | 126.14(2)                              |
| OW-H1...Br1 <sup>vi</sup>    | 0.70(5)  | 2.92(4)   | 3.383(3)   | 126.14(2)                              |
| OW-H2...Br2 <sup>vii</sup>   | 0.78(6)  | 2.77(4)   | 3.298(3)   | 126.33(2)                              |
| OW-H2...Br2 <sup>viii</sup>  | 0.78(6)  | 2.77(4)   | 3.298(3)   | 126.33(2)                              |
| <b>Br6</b>                   |          |           |            |                                        |
| O1W-H1W1...Br <sup>ix</sup>  | 0.82(4)  | 2.55(4)   | 3.3469(18) | 165(5)                                 |
| O2W-H1W2...Br <sup>x</sup>   | 0.74(4)  | 2.63(4)   | 3.3450(12) | 165(4)                                 |
| <b>I6</b>                    |          |           |            |                                        |
| O1W-H1W1...I <sup>ix</sup>   | 0.87(13) | 2.72(14)  | 3.564(7)   | 162(14)                                |
| O2W-H1W2...I <sup>xi</sup>   | 0.97(13) | 2.89(15)  | 3.566(5)   | 127(12)                                |
| O2W-H1W2...I <sup>x</sup>    | 0.97(13) | 3.02(15)  | 3.811(5)   | 140(13)                                |

Symmetry codes: <sup>i</sup> x, 1-y, -1/2+z; <sup>ii</sup> 1/2-x, 1/2+y, 3/2-z; <sup>iii</sup> 1+x-y, 1-y, -z; <sup>iv</sup> -1/2+x, 3/2-y, 3/2-z; <sup>v</sup> 1/2-x, 1-y, 1/2+z; <sup>vi</sup> 1/2-x, 2-y, 1/2+z; <sup>vii</sup> 1/2-x, 1-y, -1/2+z; <sup>viii</sup> 1/2-x, 2-y, -1/2+z; <sup>ix</sup> x-y, -y-z; <sup>x</sup> 1+x, y, z; <sup>xi</sup> 1+x, y, 1+z;

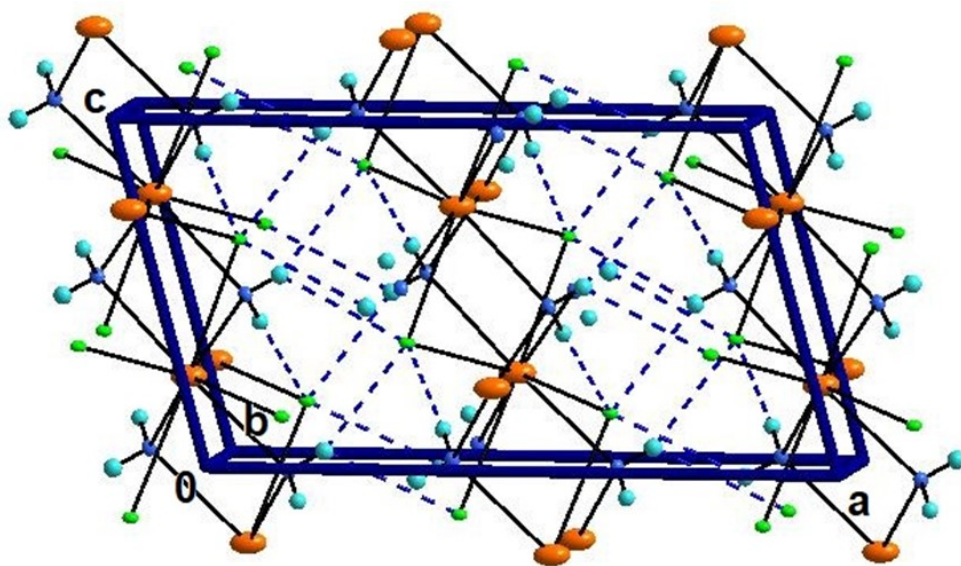

Fig. S1. Packing diagram of **Cl2**. The Eu ellipsoids are drawn at 99 % probability, all others - at 50 %. The hydrogen bonds are dashed blue.

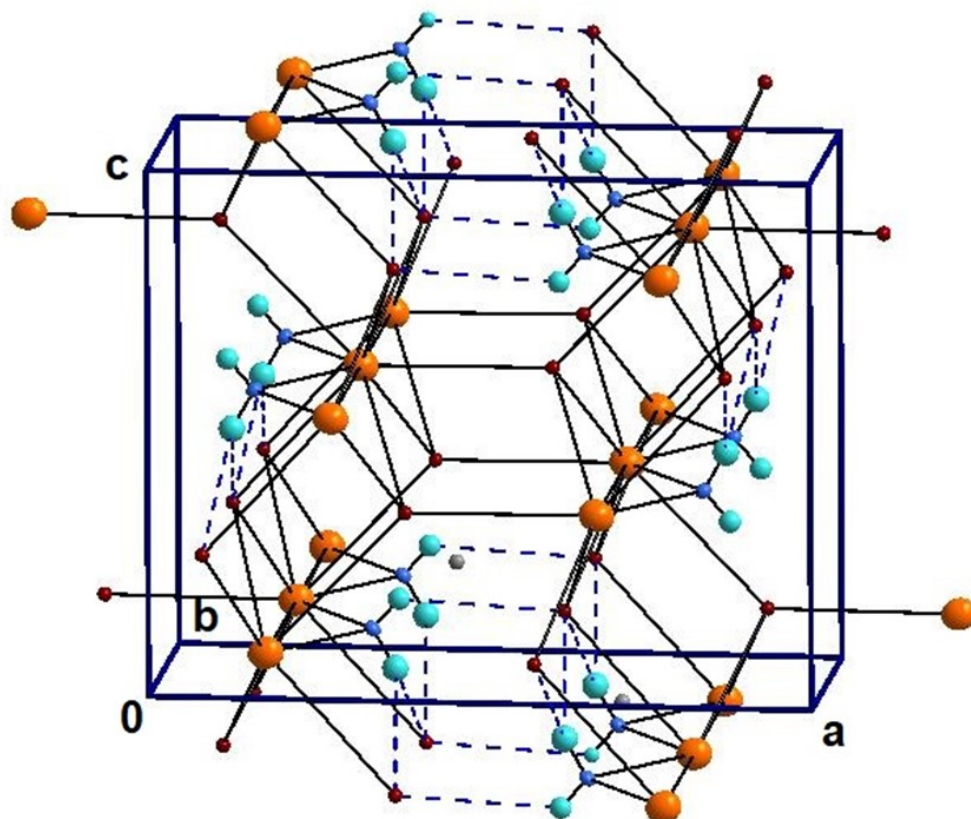

Fig. S2. Packing diagram of **Br1**. The Eu ellipsoids are drawn at 99 % probability, all others - at 50 %. The hydrogen bonds are dashed blue.

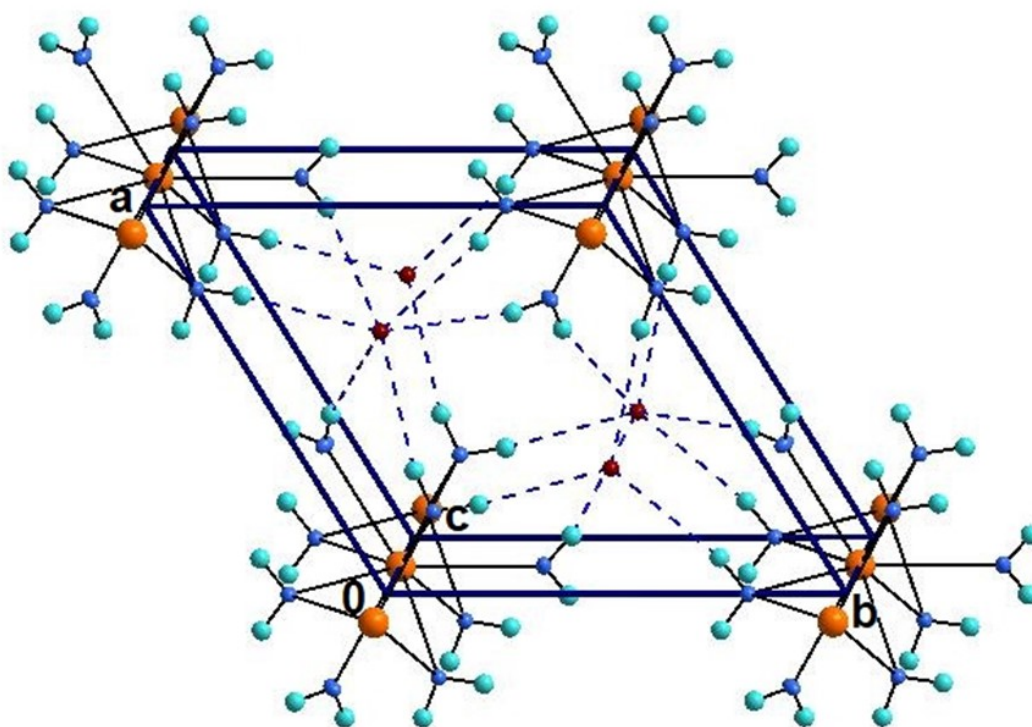

Fig. S3. Packing diagram of **Br6**. The Eu ellipsoids are drawn at 99 % probability, all others - at 50 %. The hydrogen bonds are dashed blue.

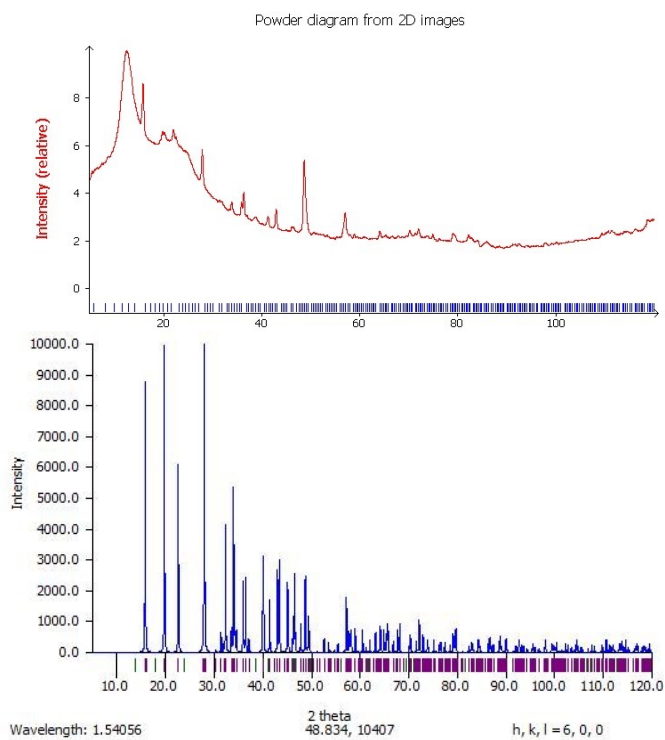

Fig. S4. Experimental<sup>1</sup> (upper diagram) and simulated<sup>2</sup> (lower diagram) powder diffractogram of **Cl2**.

Powder diagram from 2D images

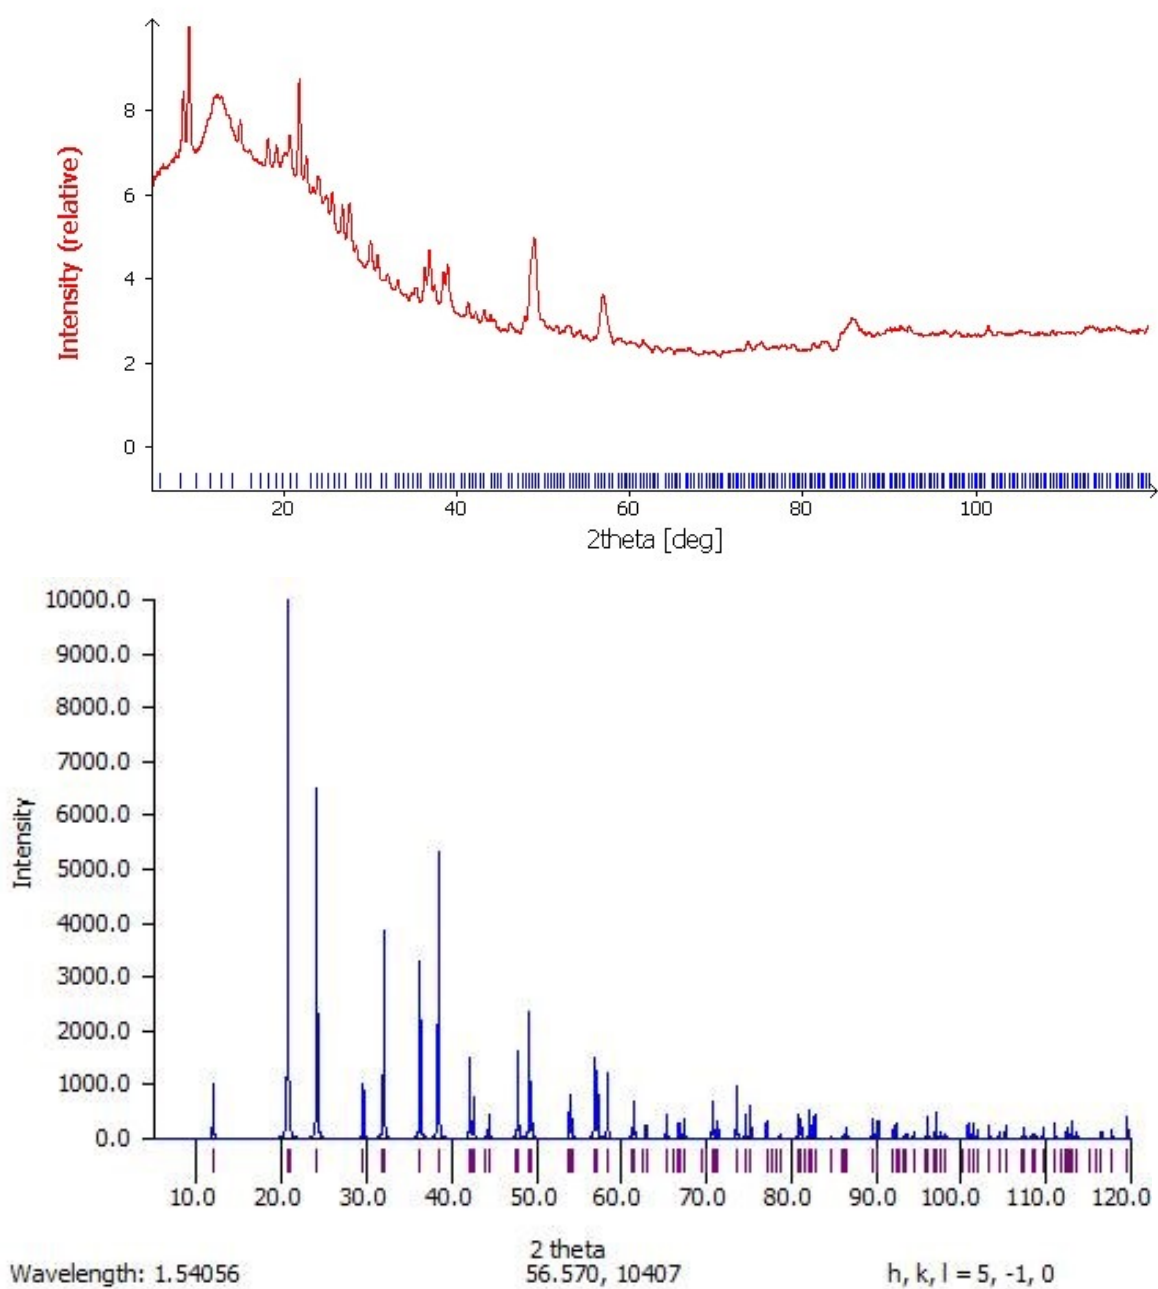

Fig. S5. Experimental<sup>1</sup> (upper diagram) and simulated<sup>2</sup> (lower diagram) powder diffractogram of **16**.

<sup>1</sup> Rigaku Oxford Diffraction, (2023), CrysAlisPro Software system, version 1.171.42.50a, Rigaku Corporation, Wrocław, Poland.

<sup>2</sup> Mercury 4.0: from visualization to analysis, design and prediction C. F. Macrae, I. Sovago, S. J. Cottrell, P. T. A. Galek, P. McCabe, E. Pidcock, M. Platings, G. P. Shields, J. S. Stevens, M. Towler and P. A. Wood, *J. Appl. Cryst.*, 2020, **53**, 226-235,
